# Supplementary material for: Origin and Potential Expansion of the Invasive Longan Lanternfly, Pyrops candelaria (Hemiptera: Fulgoridae) in Taiwan
Source: MDPI journal article supplement (doi:10.3390/biology10070678), 2021-07-17
Supplement: s1 [file s1]

**Table S4.** Pairwise genetic distances between different populations of *Pyrops candelaria* based on partial mitochondrial COI and ND2 sequences.

|      | TBL    | TWG    | TGM    | TBT    | TLK    | TZH    | TKM    | TMA    | CMC    | CHK    | CGD    | CHN    | CFJ    | THAI |
|------|--------|--------|--------|--------|--------|--------|--------|--------|--------|--------|--------|--------|--------|------|
| TBL  |        |        |        |        |        |        |        |        |        |        |        |        |        |      |
| TWG  | 0.0000 |        |        |        |        |        |        |        |        |        |        |        |        |      |
| TGM  | 0.0000 | 0.0000 |        |        |        |        |        |        |        |        |        |        |        |      |
| TBT  | 0.0000 | 0.0000 | 0.0000 |        |        |        |        |        |        |        |        |        |        |      |
| TLK  | 0.0000 | 0.0000 | 0.0000 | 0.0000 |        |        |        |        |        |        |        |        |        |      |
| TZH  | 0.0000 | 0.0000 | 0.0000 | 0.0000 | 0.0000 |        |        |        |        |        |        |        |        |      |
| TKM  | 0.0010 | 0.0010 | 0.0010 | 0.0010 | 0.0010 | 0.0010 |        |        |        |        |        |        |        |      |
| TMA  | 0.0025 | 0.0025 | 0.0025 | 0.0025 | 0.0025 | 0.0025 | 0.0027 |        |        |        |        |        |        |      |
| CMC  | 0.0008 | 0.0008 | 0.0008 | 0.0008 | 0.0008 | 0.0008 | 0.0010 | 0.0017 |        |        |        |        |        |      |
| CHK  | 0.0008 | 0.0008 | 0.0008 | 0.0008 | 0.0008 | 0.0008 | 0.0013 | 0.0022 | 0.0006 |        |        |        |        |      |
| CGD  | 0.0025 | 0.0025 | 0.0025 | 0.0025 | 0.0025 | 0.0025 | 0.0023 | 0.0033 | 0.0017 | 0.0022 |        |        |        |      |
| CHN  | 0.0033 | 0.0033 | 0.0033 | 0.0033 | 0.0033 | 0.0033 | 0.0041 | 0.0055 | 0.0038 | 0.0039 | 0.0055 |        |        |      |
| CFJ  | 0.0109 | 0.0109 | 0.0109 | 0.0109 | 0.0109 | 0.0109 | 0.0111 | 0.0117 | 0.010  | 0.0106 | 0.0117 | 0.0139 |        |      |
| THAI | 0.0032 | 0.0032 | 0.0032 | 0.0032 | 0.0032 | 0.0032 | 0.0035 | 0.0041 | 0.0024 | 0.0030 | 0.0041 | 0.0062 | 0.0125 |      |

TBL = Bali; TWG = Wugu; TGM = Guanyin Mountain; TBT = Beitou; TLK = Linkou; TZH = Zhonghe; TKM = Kinmen;  
TMA = Matsu; CMC = Macau; CHK = Hong Kong; CGD = Guangdong; CHN = Hainan; CFJ = Fujian; THAI = Thailand.
