# Supplementary material for: Origin and Potential Expansion of the Invasive Longan Lanternfly, Pyrops candelaria (Hemiptera: Fulgoridae) in Taiwan
Source: MDPI journal article supplement (doi:10.3390/biology10070678), 2021-07-17
Supplement: s1 [file s1]

**Table S1.** Collecting information for the samples of longan lanternfly used in the study and GenBank accession numbers.

| Sample code | Location                                               | Date         | Collector   | GenBank accession No.<br>for COI sequences | GenBank accession No.<br>for ND2 sequences |
|-------------|--------------------------------------------------------|--------------|-------------|--------------------------------------------|--------------------------------------------|
| CGD1        | Xianhu Botanical garden,<br>Shenzhen, Guangdong, China | IX-07-2011   | Y.-Y. Li    | KM244702                                   | KM244702                                   |
| CFJ1        | Fujian, China                                          | -            | -           | FJ006724                                   | FJ006724                                   |
| CHN1        | Hainan, China                                          | V-07-2020    | D.-Z. Qin   | MZ350301                                   | MZ358925                                   |
| CHN2        | Hainan, China                                          | V-07-2020    | D.-Z. Qin   | MZ350302                                   | MZ358926                                   |
| CHN3        | Hainan, China                                          | V-07-2020    | D.-Z. Qin   | MZ350303                                   | MZ358927                                   |
| CHN4        | Hainan, China                                          | V-07-2020    | D.-Z. Qin   | MZ350304                                   | MZ358928                                   |
| CHN5        | Hainan, China                                          | V-07-2020    | D.-Z. Qin   | MZ350305                                   | MZ358929                                   |
| CHK1        | Hong Kong                                              | X-22-2019    | C.-M. Leong | MZ350306                                   | MZ358930                                   |
| CHK2        | Hong Kong                                              | XI-11-2019   | C.-M. Leong | MZ350307                                   | MZ358931                                   |
| CHK3        | Hong Kong                                              | XI-11-2019   | C.-M. Leong | MZ350308                                   | MZ358932                                   |
| CMC1        | Macau                                                  | IX-09-2018   | C.-M. Leong | MZ350309                                   | MZ358933                                   |
| TKM1        | Kinmen, Taiwan                                         | VII-12-2001  | H.-T. Shih  | MZ350310                                   | MZ358934                                   |
| TKM2        | Kinmen, Taiwan                                         | VII-12-2001  | H.-T. Shih  | MZ350311                                   | MZ358935                                   |
| TKM3        | Kinmen, Taiwan                                         | VII-12-2001  | H.-T. Shih  | MZ350312                                   | MZ358936                                   |
| TKM4        | Lieyu, Kinmen, Taiwan                                  | VIII-29-2018 | B.-T. Chen  | MZ350313                                   | MZ358937                                   |
| TKM5        | Lieyu, Kinmen, Taiwan                                  | VIII-29-2018 | B.-T. Chen  | MZ350314                                   | MZ358938                                   |
| TKM6        | Lieyu, Kinmen, Taiwan                                  | VIII-29-2018 | B.-T. Chen  | MZ350315                                   | MZ358939                                   |
| TKM7        | Lieyu, Kinmen, Taiwan                                  | VIII-29-2018 | B.-T. Chen  | MZ350316                                   | MZ358940                                   |
| TKM8        | Lieyu, Kinmen, Taiwan                                  | VIII-29-2018 | B.-T. Chen  | MZ350317                                   | MZ358941                                   |
| TKM9        | Lieyu, Kinmen, Taiwan                                  | VIII-29-2018 | B.-T. Chen  | MZ350318                                   | MZ358942                                   |

|       |                               |              |             |          |          |
|-------|-------------------------------|--------------|-------------|----------|----------|
| TKM10 | Lieyu, Kinmen, Taiwan         | VIII-29-2018 | B.-T. Chen  | MZ350319 | MZ358942 |
| TKM11 | Lieyu, Kinmen, Taiwan         | VIII-29-2018 | B.-T. Chen  | MZ350320 | MZ358944 |
| TKM12 | Lieyu, Kinmen, Taiwan         | VIII-29-2018 | B.-T. Chen  | MZ350321 | MZ358945 |
| TKM13 | Kinmen, Taiwan                | IX-02-2020   | Y.-S. Lin   | MZ350322 | MZ358946 |
| TKM14 | Kinmen, Taiwan                | IX-02-2020   | Y.-S. Lin   | MZ350323 | MZ358947 |
| TKM15 | Kinmen, Taiwan                | IX-02-2020   | Y.-S. Lin   | MZ350324 | MZ358948 |
| TKM16 | Kinmen, Taiwan                | IX-02-2020   | Y.-S. Lin   | MZ350325 | MZ358949 |
| TKM17 | Kinmen, Taiwan                | IX-03-2020   | Y.-S. Lin   | MZ350326 | MZ358950 |
| TKM18 | Kinmen, Taiwan                | IX-03-2020   | Y.-S. Lin   | MZ350327 | MZ358951 |
| TKM19 | Lieyu, Kinmen, Taiwan         | IX-03-2020   | Y.-S. Lin   | MZ350328 | MZ358952 |
| TKM20 | Lieyu, Kinmen, Taiwan         | IX-03-2020   | Y.-S. Lin   | MZ350329 | MZ358953 |
| TMA1  | Matsu, Taiwan                 | XI-23-2018   | D.-C. Chen  | MZ350330 | MZ358954 |
| TBL1  | Bali, New Taipei City, Taiwan | VIII-27-2018 | C.-Y. Jiang | MZ350331 | MZ358955 |
| TBL2  | Bali, New Taipei City, Taiwan | VIII-27-2018 | C.-Y. Jiang | MZ350332 | MZ358956 |
| TBL3  | Bali, New Taipei City, Taiwan | VIII-27-2018 | C.-Y. Jiang | MZ350333 | MZ358957 |
| TBL4  | Bali, New Taipei City, Taiwan | VIII-27-2018 | C.-Y. Jiang | MZ350334 | MZ358958 |
| TBL5  | Bali, New Taipei City, Taiwan | VIII-27-2018 | C.-Y. Jiang | MZ350335 | MZ358959 |
| TBL6  | Bali, New Taipei City, Taiwan | VIII-27-2018 | C.-Y. Jiang | MZ350336 | MZ358960 |
| TBL7  | Bali, New Taipei City, Taiwan | VIII-27-2018 | C.-Y. Jiang | MZ350337 | MZ358961 |
| TBL8  | Bali, New Taipei City, Taiwan | VIII-27-2018 | C.-Y. Jiang | MZ350338 | MZ358962 |
| TBL9  | Bali, New Taipei City, Taiwan | VIII-27-2018 | C.-Y. Jiang | MZ350339 | MZ358963 |
| TBL10 | Bali, New Taipei City, Taiwan | IV-10-2019   | Y.-S. Lin   | MZ350340 | MZ358964 |
| TBL11 | Bali, New Taipei City, Taiwan | IV-10-2019   | Y.-S. Lin   | MZ350341 | MZ358965 |
| TBL12 | Bali, New Taipei City, Taiwan | IV-10-2019   | Y.-S. Lin   | MZ350342 | MZ358966 |

|       |                                      |              |           |          |          |
|-------|--------------------------------------|--------------|-----------|----------|----------|
| TBL13 | Bali, New Taipei City, Taiwan        | IV-10-2019   | Y.-S. Lin | MZ350343 | MZ358967 |
| TBL14 | Bali, New Taipei City, Taiwan        | IV-10-2019   | Y.-S. Lin | MZ350344 | MZ358968 |
| TBL15 | Bali, New Taipei City, Taiwan        | IV-10-2019   | Y.-S. Lin | MZ350345 | MZ358969 |
| TBL16 | Bali, New Taipei City, Taiwan        | IV-10-2019   | Y.-S. Lin | MZ350346 | MZ358970 |
| TBL17 | Bali, New Taipei City, Taiwan        | VIII-22-2019 | Y.-S. Lin | MZ350347 | MZ358971 |
| TBL18 | Bali, New Taipei City, Taiwan        | VIII-22-2019 | Y.-S. Lin | MZ350348 | MZ358972 |
| TBL19 | Bali, New Taipei City, Taiwan        | VIII-29-2019 | Y.-S. Lin | MZ350349 | MZ358973 |
| TBL20 | Bali, New Taipei City, Taiwan        | VIII-29-2019 | Y.-S. Lin | MZ350350 | MZ358974 |
| TBL21 | Bali, New Taipei City, Taiwan        | VIII-29-2019 | Y.-S. Lin | MZ350351 | MZ358975 |
| TBL22 | Bali, New Taipei City, Taiwan        | VIII-29-2019 | Y.-S. Lin | MZ350352 | MZ358976 |
| TBL23 | Bali, New Taipei City, Taiwan        | VIII-29-2019 | Y.-S. Lin | MZ350353 | MZ358977 |
| TBL24 | Bali, New Taipei City, Taiwan        | VIII-29-2019 | Y.-S. Lin | MZ350354 | MZ358978 |
| TBL25 | Bali, New Taipei City, Taiwan        | VIII-29-2019 | Y.-S. Lin | MZ350355 | MZ358979 |
| TBL26 | Bali, New Taipei City, Taiwan        | VIII-29-2019 | Y.-S. Lin | MZ350356 | MZ358980 |
| TBL27 | Bali, New Taipei City, Taiwan        | VIII-29-2019 | Y.-S. Lin | MZ350357 | MZ358981 |
| TBT1  | Beitou, Taipei, Taiwan               | IX-21-2018   | BAPHIQ    | MZ350358 | MZ358982 |
| TBT2  | Beitou, Taipei, Taiwan               | IX-21-2018   | BAPHIQ    | MZ350359 | MZ358983 |
| TBT3  | Beitou, Taipei, Taiwan               | IX-21-2018   | BAPHIQ    | MZ350360 | MZ358984 |
| TBT4  | Beitou, Taipei, Taiwan               | VIII-28-2019 | Y.-S. Lin | MZ350361 | MZ358985 |
| TBT5  | Beitou, Taipei, Taiwan               | VIII-28-2019 | Y.-S. Lin | MZ350362 | MZ358986 |
| TBT6  | Beitou, Taipei, Taiwan               | VIII-28-2019 | Y.-S. Lin | MZ350363 | MZ358987 |
| TBT7  | Guizikeng, Beitou, Taipei,<br>Taiwan | VII-16-2019  | Y.-S. Lin | MZ350364 | MZ358988 |
| TBT8  | Guizikeng, Beitou, Taipei,<br>Taiwan | VIII-28-2019 | Y.-S. Lin | MZ350365 | MZ358989 |

|       |                                             |              |             |          |          |
|-------|---------------------------------------------|--------------|-------------|----------|----------|
| TBT9  | Guizikeng, Beitou, Taipei,<br>Taiwan        | VIII-28-2019 | Y.-S. Lin   | MZ350366 | MZ358990 |
| TBT10 | Guizikeng, Beitou, Taipei,<br>Taiwan        | VIII-28-2019 | Y.-S. Lin   | MZ350367 | MZ358991 |
| TBT11 | Guizikeng, Beitou, Taipei,<br>Taiwan        | VIII-28-2019 | Y.-S. Lin   | MZ350368 | MZ358992 |
| TBT12 | Guizikeng, Beitou, Taipei,<br>Taiwan        | VIII-28-2019 | Y.-S. Lin   | MZ350369 | MZ358993 |
| TBT13 | Guizikeng, Beitou, Taipei,<br>Taiwan        | VIII-28-2019 | Y.-S. Lin   | MZ350370 | MZ358994 |
| TBT14 | Guizikeng, Beitou, Taipei,<br>Taiwan        | X-05-2019    | S.-H. Lin   | MZ350371 | MZ358995 |
| TBT15 | Guizikeng, Beitou, Taipei,<br>Taiwan        | X-05-2019    | S.-H. Lin   | MZ350372 | MZ358996 |
| TBT16 | Guizikeng, Beitou, Taipei,<br>Taiwan        | X-05-2019    | S.-H. Lin   | MZ350373 | MZ358997 |
| TBT17 | Guizikeng, Beitou, Taipei,<br>Taiwan        | X-05-2019    | S.-H. Lin   | MZ350374 | MZ358998 |
| TBT18 | Guizikeng, Beitou, Taipei,<br>Taiwan        | X-05-2019    | S.-H. Lin   | MZ350375 | MZ358999 |
| TBT19 | Beitou, Taipei, Taiwan                      | X-09-2019    | Y.-S. Lin   | MZ350376 | MZ359000 |
| TBT20 | Beitou, Taipei, Taiwan                      | X-09-2019    | Y.-S. Lin   | MZ350377 | MZ359001 |
| TBT21 | Beitou, Taipei, Taiwan                      | X-26-2019    | S.-H. Lin   | MZ350378 | MZ359002 |
| TBT22 | Beitou, Taipei, Taiwan                      | IV-20-2020   | Y.-S. Lin   | MZ350379 | MZ359003 |
| TGM1  | Guanyin Moutain, New Taipei<br>City, Taiwan | X-23-2018    | C.-Y. Jiang | MZ350380 | MZ359004 |
| TGM2  | Guanyin Moutain, New Taipei                 | X-23-2018    | C.-Y. Jiang | MZ350381 | MZ359005 |

|       |                                             |              |             |          |          |
|-------|---------------------------------------------|--------------|-------------|----------|----------|
|       | City, Taiwan                                |              |             |          |          |
| TGM3  | Guanyin Moutain, New Taipei<br>City, Taiwan | X-23-2018    | C.-Y. Jiang | MZ350382 | MZ359006 |
| TGM4  | Guanyin Moutain, New Taipei<br>City, Taiwan | X-23-2018    | C.-Y. Jiang | MZ350383 | MZ359007 |
| TGM5  | Guanyin Moutain, New Taipei<br>City, Taiwan | X-23-2018    | C.-Y. Jiang | MZ350384 | MZ359008 |
| TGM6  | Guanyin Moutain, New Taipei<br>City, Taiwan | X-23-2018    | C.-Y. Jiang | MZ350385 | MZ359009 |
| TGM7  | Guanyin Moutain, New Taipei<br>City, Taiwan | X-23-2018    | C.-Y. Jiang | MZ350386 | MZ359010 |
| TGM8  | Guanyin Moutain, New Taipei<br>City, Taiwan | X-23-2018    | C.-Y. Jiang | MZ350387 | MZ359011 |
| TGM9  | Guanyin Moutain, New Taipei<br>City, Taiwan | X-23-2018    | C.-Y. Jiang | MZ350388 | MZ359012 |
| TGM10 | Guanyin Moutain, New Taipei<br>City, Taiwan | X-23-2018    | C.-Y. Jiang | MZ350389 | MZ359013 |
| TGM11 | Guanyin Moutain, New Taipei<br>City, Taiwan | X-23-2018    | C.-Y. Jiang | MZ350390 | MZ359014 |
| TGM12 | Guanyin Moutain, New Taipei<br>City, Taiwan | X-23-2018    | C.-Y. Jiang | MZ350391 | MZ359015 |
| TGM13 | Guanyin Moutain, New Taipei<br>City, Taiwan | X-23-2018    | C.-Y. Jiang | MZ350392 | MZ359016 |
| TGM14 | Guanyin Moutain, New Taipei<br>City, Taiwan | X-23-2018    | C.-Y. Jiang | MZ350393 | MZ359017 |
| TGM15 | Guanyin Moutain, New Taipei<br>City, Taiwan | X-23-2018    | C.-Y. Jiang | MZ350394 | MZ359018 |
| TLK1  | Linkou, Taipei, Taiwan                      | VIII-24-2020 | Y.-S. Lin   | MZ350395 | MZ359019 |

|       |                               |              |             |          |          |
|-------|-------------------------------|--------------|-------------|----------|----------|
| TLK2  | Linkou, Taipei, Taiwan        | VIII-24-2020 | Y.-S. Lin   | MZ350396 | MZ359020 |
| TLK3  | Linkou, Taipei, Taiwan        | VIII-24-2020 | Y.-S. Lin   | MZ350397 | MZ359021 |
| TLK4  | Linkou, Taipei, Taiwan        | VIII-24-2020 | Y.-S. Lin   | MZ350398 | MZ359022 |
| TLK5  | Linkou, Taipei, Taiwan        | VIII-24-2020 | Y.-S. Lin   | MZ350399 | MZ359023 |
| TLK6  | Linkou, Taipei, Taiwan        | VIII-24-2020 | Y.-S. Lin   | MZ350400 | MZ359024 |
| TLK7  | Linkou, Taipei, Taiwan        | VIII-24-2020 | Y.-S. Lin   | MZ350401 | MZ359025 |
| TLK8  | Linkou, Taipei, Taiwan        | VIII-24-2020 | Y.-S. Lin   | MZ350402 | MZ359026 |
| TLK9  | Linkou, Taipei, Taiwan        | VIII-24-2020 | Y.-S. Lin   | MZ350403 | MZ359027 |
| TLK10 | Linkou, Taipei, Taiwan        | VIII-24-2020 | Y.-S. Lin   | MZ350404 | MZ359028 |
| TLK11 | Linkou, Taipei, Taiwan        | VIII-24-2020 | Y.-S. Lin   | MZ350405 | MZ359029 |
| TLK12 | Linkou, Taipei, Taiwan        | VIII-24-2020 | Y.-S. Lin   | MZ350406 | MZ359030 |
| TLK13 | Linkou, Taipei, Taiwan        | VIII-24-2020 | Y.-S. Lin   | MZ350407 | MZ359031 |
| TLK14 | Linkou, Taipei, Taiwan        | VIII-24-2020 | Y.-S. Lin   | MZ350408 | MZ359032 |
| TLK15 | Linkou, Taipei, Taiwan        | VIII-24-2020 | Y.-S. Lin   | MZ350409 | MZ359033 |
| TLK16 | Linkou, Taipei, Taiwan        | VIII-24-2020 | Y.-S. Lin   | MZ350410 | MZ359034 |
| TLK17 | Linkou, Taipei, Taiwan        | VIII-24-2020 | Y.-S. Lin   | MZ350411 | MZ359035 |
| TLK18 | Linkou, Taipei, Taiwan        | VIII-24-2020 | Y.-S. Lin   | MZ350412 | MZ359036 |
| TLK19 | Linkou, Taipei, Taiwan        | VIII-24-2020 | Y.-S. Lin   | MZ350413 | MZ359037 |
| TLK20 | Linkou, Taipei, Taiwan        | VIII-24-2020 | Y.-S. Lin   | MZ350414 | MZ359038 |
| TWG1  | Wugu, New Taipei City, Taiwan | XI-16-2018   | C.-Y. Jiang | MZ350415 | MZ359039 |
| TWG2  | Wugu, New Taipei City, Taiwan | XI-16-2018   | C.-Y. Jiang | MZ350416 | MZ359040 |
| TWG3  | Wugu, New Taipei City, Taiwan | XI-16-2018   | C.-Y. Jiang | MZ350417 | MZ359041 |
| TWG4  | Wugu, New Taipei City, Taiwan | XI-16-2018   | C.-Y. Jiang | MZ350418 | MZ359042 |
| TWG5  | Wugu, New Taipei City, Taiwan | XI-16-2018   | C.-Y. Jiang | MZ350419 | MZ359043 |

|       |                                   |              |                  |          |          |
|-------|-----------------------------------|--------------|------------------|----------|----------|
| TWG6  | Wugu, New Taipei City, Taiwan     | XI-16-2018   | C.-Y. Jiang      | MZ350420 | MZ359044 |
| TWG7  | Wugu, New Taipei City, Taiwan     | XI-16-2018   | C.-Y. Jiang      | MZ350421 | MZ359045 |
| TWG8  | Wugu, New Taipei City, Taiwan     | XI-16-2018   | C.-Y. Jiang      | MZ350422 | MZ359046 |
| TWG9  | Wugu, New Taipei City, Taiwan     | XI-16-2018   | C.-Y. Jiang      | MZ350423 | MZ359047 |
| TWG10 | Wugu, New Taipei City, Taiwan     | XI-16-2018   | C.-Y. Jiang      | MZ350424 | MZ359048 |
| TWG11 | Wugu, New Taipei City, Taiwan     | VIII-29-2019 | Y.-S. Lin        | MZ350425 | MZ359049 |
| TWG12 | Wugu, New Taipei City, Taiwan     | VIII-29-2019 | Y.-S. Lin        | MZ350426 | MZ359050 |
| TWG13 | Wugu, New Taipei City, Taiwan     | VIII-29-2019 | Y.-S. Lin        | MZ350427 | MZ359051 |
| TWG14 | Wugu, New Taipei City, Taiwan     | VIII-29-2019 | Y.-S. Lin        | MZ350428 | MZ359052 |
| TWG15 | Wugu, New Taipei City, Taiwan     | VIII-29-2019 | Y.-S. Lin        | MZ350429 | MZ359053 |
| TWG16 | Wugu, New Taipei City, Taiwan     | VIII-29-2019 | Y.-S. Lin        | MZ350430 | MZ359054 |
| TWG17 | Wugu, New Taipei City, Taiwan     | VIII-29-2019 | Y.-S. Lin        | MZ350431 | MZ359055 |
| TWG18 | Wugu, New Taipei City, Taiwan     | VIII-29-2019 | Y.-S. Lin        | MZ350432 | MZ359056 |
| TWG19 | Wugu, New Taipei City, Taiwan     | VIII-29-2019 | Y.-S. Lin        | MZ350433 | MZ359057 |
| TWG20 | Wugu, New Taipei City, Taiwan     | XI-13-2019   | Y.-S. Lin        | MZ350434 | MZ359058 |
| TZH1  | Zhonghe, Taipei, Taiwan           | VIII-06-2019 | BAPHIQ           | MZ350435 | MZ359059 |
| THAI1 | Chiang Mai, Thailand              | III-05-2020  | K. Jiaranaisakul | MZ350436 | MZ359060 |
| THAI2 | Chiang Mai, Thailand              | III-05-2020  | K. Jiaranaisakul | MZ350437 | MZ359061 |
| THAI3 | Chiang Mai, Thailand              | III-05-2020  | K. Jiaranaisakul | MZ350438 | MZ359062 |
| THAI4 | Chiang Mai, Thailand              | III-05-2020  | K. Jiaranaisakul | MZ350439 | MZ359063 |
| THAI5 | Soi Dao, Chantaburi, Thailand     | II-16-2020   | K. Jiaranaisakul | MZ350440 | MZ359064 |
| THAI6 | Suan Phueng, Ratchaburi, Thailand | V-13-2020    | K. Jiaranaisakul | MZ350441 | MZ359065 |
| THAI7 | Suan Phueng, Ratchaburi, Thailand | X-18-2020    | K. Jiaranaisakul | MZ350442 | MZ359066 |

|        |                                      |           |                 |          |          |
|--------|--------------------------------------|-----------|-----------------|----------|----------|
| THAI8  | Suan Phueng, Ratchaburi,<br>Thailand | X-18-2020 | K. Jaranaisakul | MZ350443 | MZ359067 |
| THAI9  | Suan Phueng, Ratchaburi,<br>Thailand | X-18-2020 | K. Jaranaisakul | MZ350444 | MZ359068 |
| THAI10 | Suan Phueng, Ratchaburi,<br>Thailand | X-20-2020 | K. Jaranaisakul | MZ350445 | MZ359069 |
| THAI11 | Suan Phueng, Ratchaburi,<br>Thailand | X-20-2020 | K. Jaranaisakul | MZ350446 | MZ359070 |
| THAI12 | Ratchasima, Thailand                 | -         | K. Jaranaisakul | MZ350447 | MZ359071 |
| THAI13 | Ratchasima, Thailand                 | -         | K. Jaranaisakul | MZ350448 | MZ359072 |
| THAI14 | Mae Sai, Chiang Rai, Thailand        | X-2020    | K. Jaranaisakul | MZ350449 | MZ359073 |
| THAI15 | Thailand                             | -         | K. Jaranaisakul | MZ350450 | MZ359074 |
| THAI16 | Thailand                             | -         | K. Jaranaisakul | MZ350451 | MZ359075 |
| THAI17 | Thailand                             | -         | K. Jaranaisakul | MZ350452 | MZ359076 |
| THAI18 | Thailand                             | -         | K. Jaranaisakul | MZ350453 | MZ359077 |
| THAI19 | Thailand                             | -         | K. Jaranaisakul | MZ350454 | MZ359078 |
| THAI20 | Thailand                             | -         | K. Jaranaisakul | MZ350455 | MZ359079 |

---
